# Supplementary material
Source: PubMed Central journal article supplement (PMC3837724)
Supplement: AEM.01285-13_zam999104900so1.pdf [file AEM.01285-13_zam999104900so1.pdf]

## Supplemental Material

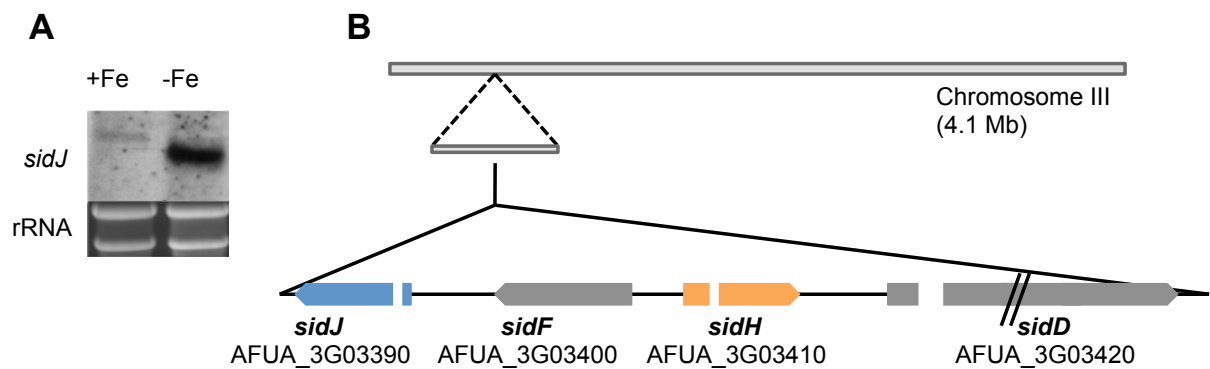

**Fig. S1. Iron regulated expression (A) and genomic location of *sidJ* (B).** (A) Northern analysis of *sidJ* expression was performed with *A. fumigatus* total RNA, which was extracted from mycelia grown in liquid iron-replete (+Fe, 30  $\mu$ M FeSO<sub>4</sub>) and iron-limited (-Fe) minimal medium for 24 hours. The *sidJ* hybridization probe was PCR-amplified using primers oAf538AH1-f and oAf538AH1-r. The primer sequences are listed in Table S1. Ethidium bromide stained rRNA is shown as a control for loading and quality of RNA. (B) Schematic view of the genomic localization of *sidJ* on supercontig 100 (<http://www.broad.mit.edu/annotation/genome/aspergillus>) and its clustering with the FSC biosynthetic genes *sidF*, *sidH*, and *sidD* (Schrettl et al., PLoS Pathog. 3:1195-1207, 2007). *SidD* is displayed shortened.

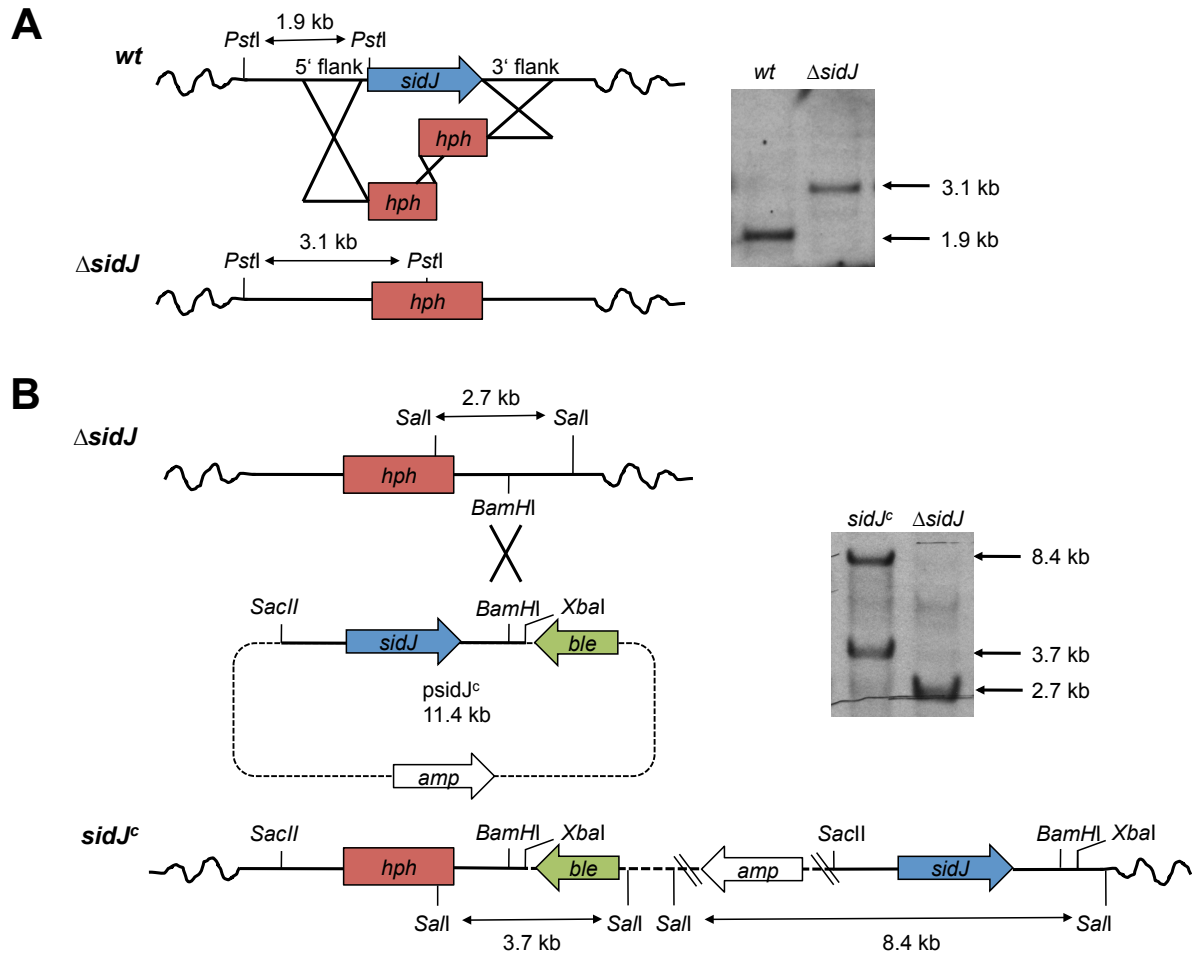

**Fig. S2: Generation of *A. fumigatus*  $\Delta$ *sidJ* (A) and *sidJ*<sup>c</sup> (B) strains.**

(A) To generate  $\Delta$ *sidJ*, the 5' flanking region of *sidJ* (1.2 kb) was amplified using primers oAFAH1-1 and oAFAH1-4 (containing an add-on restriction site for *NotI*), and the 3' flanking region (1.3 kb) was amplified using oAFAH1-2 and oAFAH1-3 (containing an add-on restriction site for *BamHI*). Subsequently, the *NotI*–*BamHI* fragment of hygromycin resistance cassette *hph* released from pPHY-TK was ligated with the *sidJ* 5' and 3' flanking regions, respectively. Each ligation product was then used as template for the amplification of the bipartite deletion constructs using primers oAFAH1-5 and oph-14 for the 5' flanking region as well as primers oAFAH1-6 and oph-15 for the 3' flanking region. Transformation of *A. fumigatus* with these fragments was performed as described earlier (Schrettl et al., PLoS Pathog. 3:1195-1207, 2007). Transformants were selected with 200  $\mu$ g/ml of hygromycin B and homologous recombination was confirmed by Southern blot analysis. DNA digested with *PstI* was blotted and probed with a hybridization probe for the 5' prime flanking region of *sidJ* using primers oAFAH1-4 and oAFAH1-5. The 3.1 kb fragment confirms *sidJ* deletion by *hph* insertion.

(B) For the reconstitution of the  $\Delta$ *sidJ* strain with a functional *sidJ* copy, a 5.0-kb *SacII*–*XbaI* fragment released from the cosmid *psidD*-COS (also designated as pANsCosSidD) was subcloned into plasmid pPhleo carrying the phleomycin resistance marker gene *ble*. The resulting 11.4-kb plasmid *psidJc* was linearized with *BamHI* and used to transform *A. fumigatus*  $\Delta$ *sidJ*. Transformants selected with 50  $\mu$ g/ml phleomycin carrying a single homologous reconstitution of the *sidJ* gene (*sidJ*<sup>c</sup>) were screened by Southern blot analysis. DNA digested with *SalI* was blotted and probed with a hybridization probe for the 3' prime flanking region of *sidJ* using primers oAFAH1-3 and oAFAH1-6. A 3.7 kb fragment confirms the  $\Delta$ *sidJ* deletion allele, while the 8.4 kb fragment represents the insertion of the *sidJ* containing plasmid. Primers are listed in Table S1.

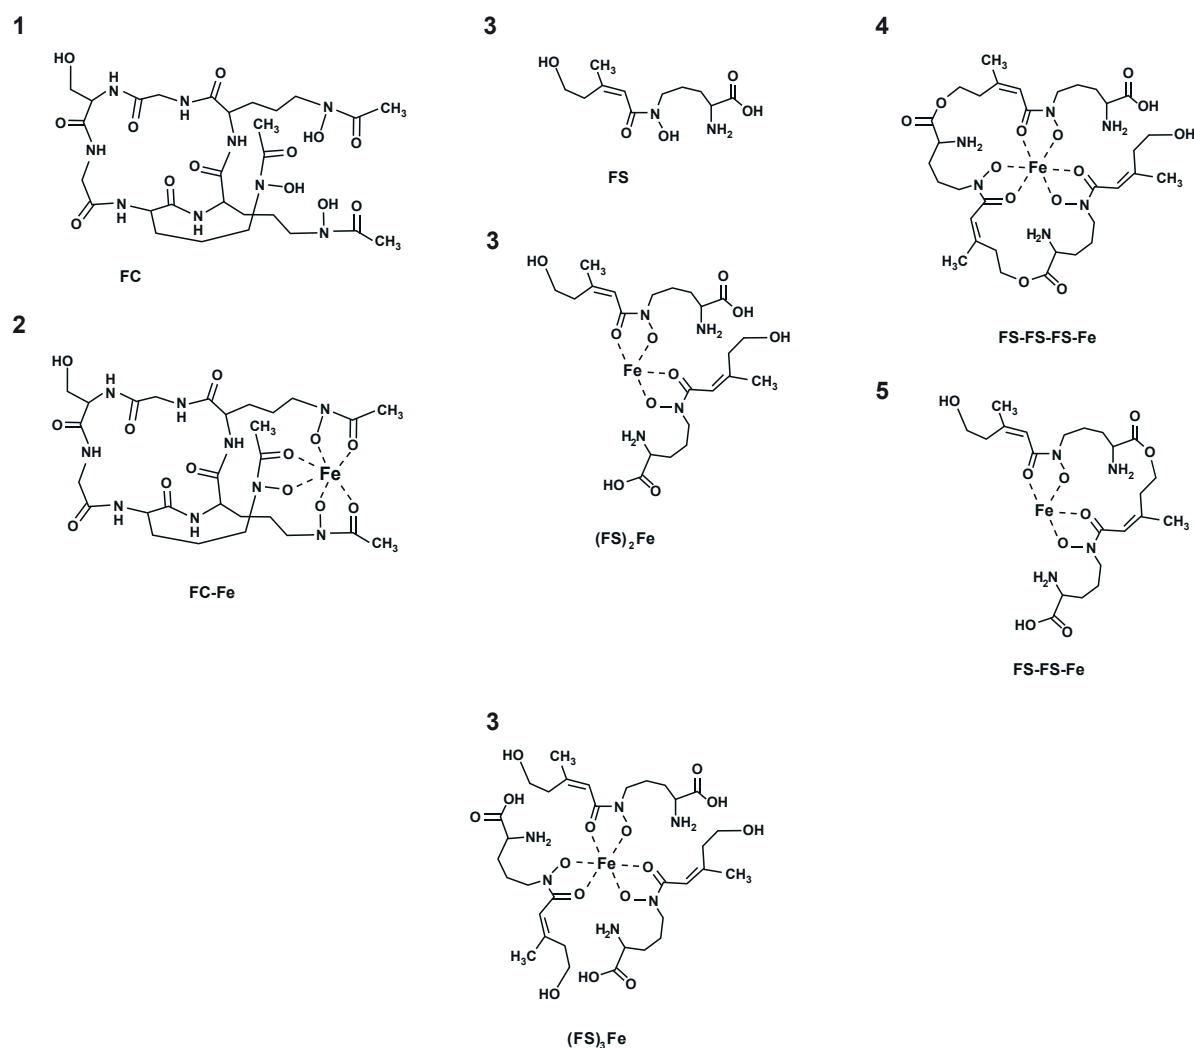

**Fig. S3: Chemical structures of the siderophores and their degradation products.** The numbers correspond to the peak numbers shown in Fig. 2. (1) and (2) are the intracellular siderophore FC in the desferri- and ferri-form, respectively. Hydrolysis of all three FSC ester bonds leads to FS and FS/iron complexes (3). The ferri-FS dimer (4) derives from hydrolysis of two FSC ester bonds. Hydrolysis of one ester bond leads to ferri-fusarinine B (5).

|                             |                                          |                |     |
|-----------------------------|------------------------------------------|----------------|-----|
| A. fumigatus XP_748659.1    | 97 KYIKEYKTEKFGGSA-----SSGKIVLMGHSTGSD   | QCVLHYLSRPNPHT | 139 |
| A. oryzae XP_001826766.     | 97 NYIKEYKTEKFG-----NGKIVLMGHSTGSD       | QCVVHYLSRPNPHT | 135 |
| P. chryogenum XP_002565941. | 96 EYIKSYKGDKFG-----GGKIALMGHSTGSD       | QCVLHYLSQSNPHT | 134 |
| T. reesei EGR44124.1        | 99 RYIKSYKNAKYG-----YSKLILMGHSTGSD       | QCVLHYLSKPNPHV | 137 |
| A. nidulans XP_663843.1     | 97 NYIRDYKSGKFASTNNSGFKGHSNSKVVLMGHSTGSD | QCVIHYLSKPNPHT | 146 |
| G. destructans ELR06329.1   | 97 KYIKDYKTDKFG-----DGKIVLMGHSSGSD       | QFVMHYLYRPNPHT | 135 |
| B. fuckeliana CCD56338.1    | 96 AYFRPIK-----SGKILILMGHSTGCD           | DDVVEYLTGPG--- | 126 |

**Fig. S4. Conserved putative lipase/esterase domain in fungal SidJ orthologs.** Multiple alignment of *A. fumigatus* SidJ (XP\_748659.1) with representative fungal orthologs. The pro site domain PS00120 is boxed with serine as active site in black. The overall sequence identity of these proteins is 64-76%.

```

S. lycopersicum K4AXQ9  EGVVLLGHSTGCQDIVYYMRTNAACSRVRAAILQAPVSDREYKATLPDTAS MIDLASNM 212
A. thaliana Q94IU8      EGVVLLGHSTGCQDIVYYMGTNAACSRVRAAILQAPVSDREYKATLPETPAMIDLAANM 231
G. max C6TIZ7          EGVALLGHSTGCQDIVHYMRTNFACSRVRAAIFQAPVSDREYQATLPHTAS MIDLAAKM 207
O. sativa B7EB72       DGVILLGHSTGCQDIVHYMRTNFACSKAVSGVILQAPVSDREYRATLPETAEMIDLAAKM 155
Z. mays C0PA79         EGVILLGHSTGCQDIVHYMRTNFACSKAVSGVILQAPVSDREYRATLPETAEMIDLAAKL 213

```

**Fig. S5. Conserved putative lipase/esterase domains in plant proteins of DUF1749 family.** Representative plant members of the DUF1749 family from the protein database (<http://embl-ebi.org/interpro/>). The pro site domain PS00120 is boxed with serine as active site in black.

**Table S1 Primers used in this study.** Introduced restriction sites are underlined.

| primer                   | sequence 5' to 3'                                           |
|--------------------------|-------------------------------------------------------------|
| oAfAH1-1                 | AAA <u>CAG</u> GCC <u>TAA</u> TGA CTG GTC CAG GCT C         |
| oAfAH1-2                 | TAC <u>TCT</u> <u>AGA</u> CAC AAG ACC TAC CAC TCC           |
| oAfAH1-3                 | CAT <u>GGA</u> <u>TCC</u> AGT GGC GAA AGA GGA TGC           |
| oAfAH1-4                 | TCG GCG GCC GCG GTT <u>CAA</u> <u>GCT</u> <u>TGT</u> CTC GG |
| oAfAH1-5                 | AGT TAG CCG AGT CCA CAG                                     |
| oAfAH1-6                 | TTT GAC TCA CTG CGC TGC                                     |
| oAf <sub>538</sub> AH1-f | CCA CAC AGT CTC CTC TTC                                     |
| oAf <sub>538</sub> AH1-r | TAC CGC TGT TTT CGT CCC                                     |
